# Supplementary material for: Transcriptome Analysis of B Cell Immune Functions in Periodontitis: Mucosal Tissue Responses to the Oral Microbiome in Aging
Source: PubMed Central journal article supplement (PMC4947588; doi:10.3389/fimmu.2016.00272), 2016-07-18
Supplement: image_1.pdf [file image_1.pdf]

### Cluster 1

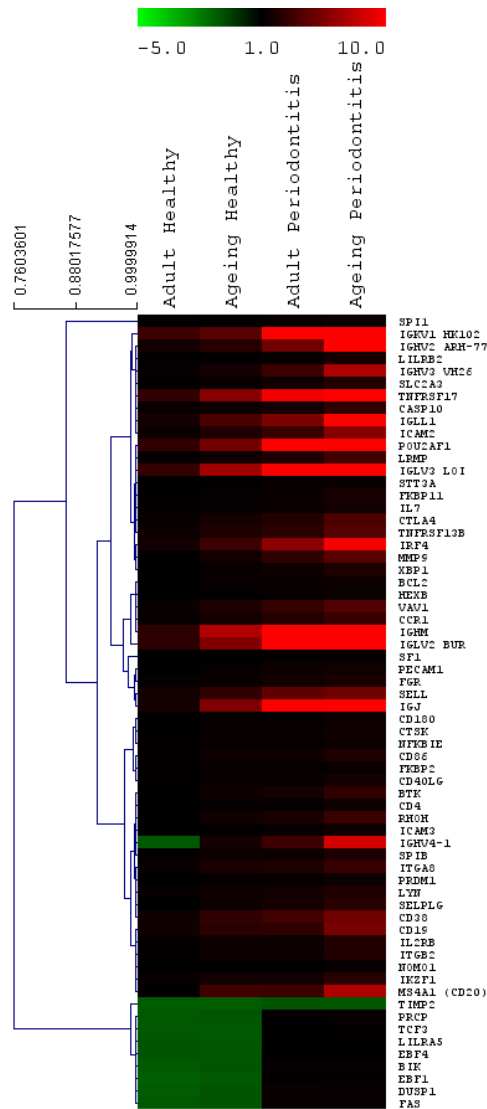

### Cluster 2

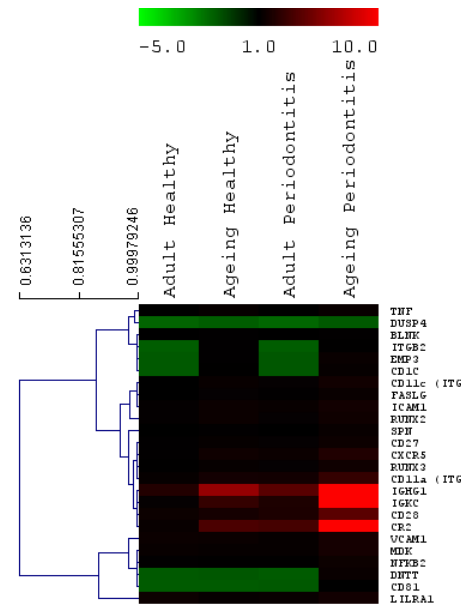

### Cluster 6

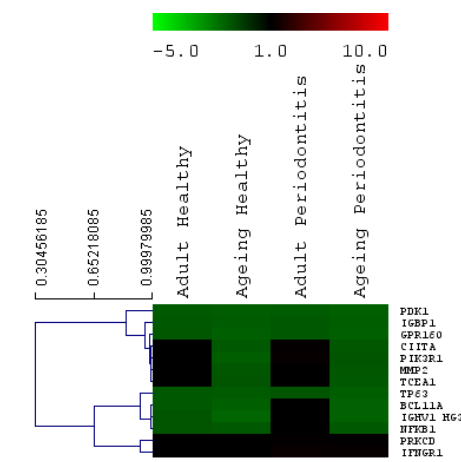

### Cluster 3

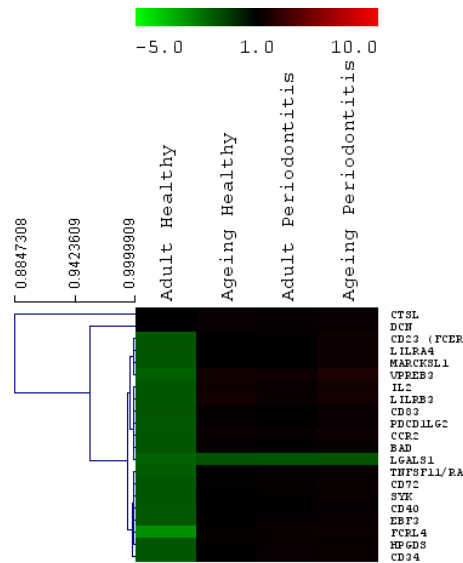

### Cluster 7

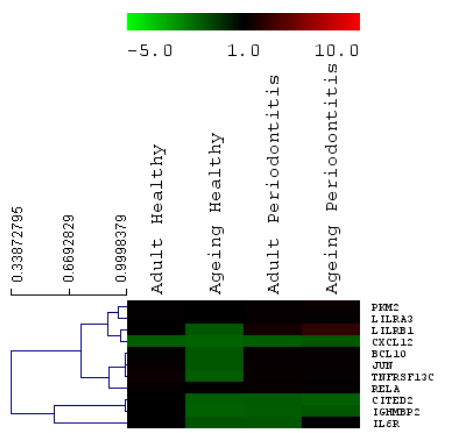

### Cluster 4

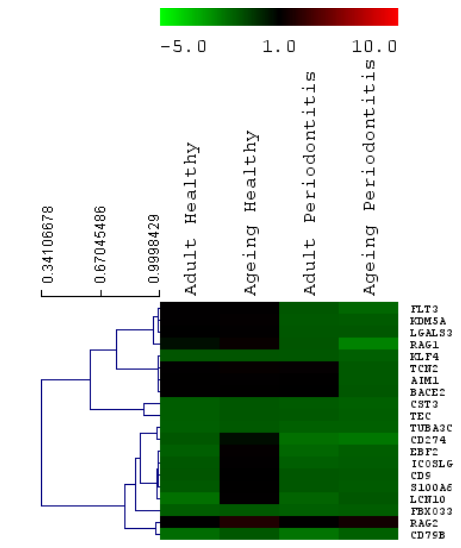

### Cluster 8

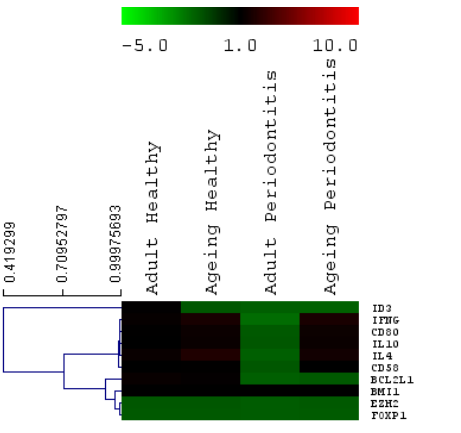

### Cluster 5

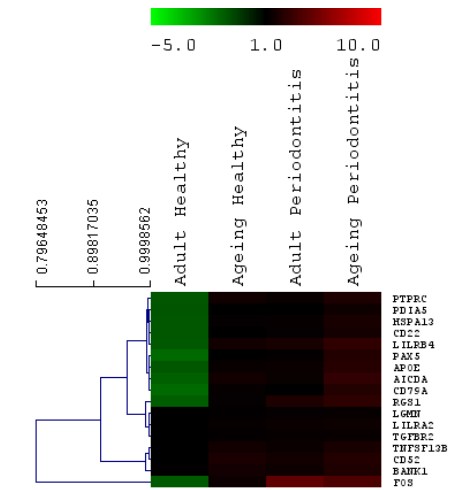

### Cluster 9

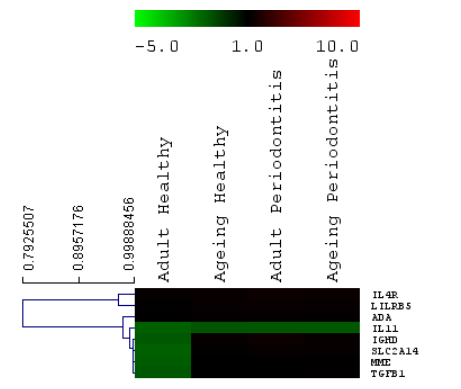

### Cluster 10

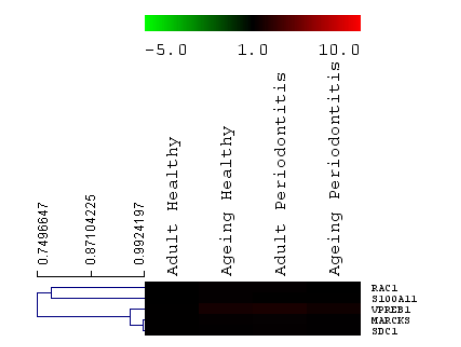

Supplementary Figure S1 | Gene clusters identified in adult and aged healthy and periodontitis tissues derived from the heatmap in Figure 5.
