# Supplementary material for: Transcriptome Analysis of B Cell Immune Functions in Periodontitis: Mucosal Tissue Responses to the Oral Microbiome in Aging
Source: PubMed Central journal article supplement (PMC4947588; doi:10.3389/fimmu.2016.00272), 2016-07-18
Supplement: table_1.pdf [file table_1.pdf]

Supplementary Table S1: Gene expression targets

| Probe ID                                   | Gene ID | Gene Descriptions                                          | Cell type | Functional Category |
|--------------------------------------------|---------|------------------------------------------------------------|-----------|---------------------|
| <b><i>Antigen-dependent activation</i></b> |         |                                                            |           |                     |
| MmugDNA.32422.1.S1_at                      | CD180   | CD180 molecule                                             | B         | 1                   |
| MmugDNA.18254.1.S1_at                      | CD19    | CD19 molecule                                              | B         | 1                   |
| MmugDNA.14306.1.S1_at                      | CD1C    | CD1c molecule                                              | B         | 1                   |
| MmugDNA.20774.1.S1_at                      | CD274   | CD274 molecule                                             | B         | 1                   |
| MmugDNA.19231.1.S1_at                      | CD28    | CD28 molecule                                              | B         | 1                   |
| MmuSTS.3490.1.S1_at                        | CD72    | CD72 molecule                                              | B         | 1                   |
| MmugDNA.37827.1.S1_at                      | CD79B   | CD79b molecule, immunoglobulin-associated beta             | B         | 1                   |
| MmugDNA.29916.1.S1_at                      | CD80    | CD80 molecule                                              | B         | 1                   |
| MmugDNA.6430.1.S1_at                       | CD83    | CD83 molecule                                              | B         | 1                   |
| MmugDNA.32699.1.S1_at                      | CD86    | CD86 molecule                                              | B         | 1                   |
| MmugDNA.19832.1.S1_at                      | CIITA   | class II, major histocompatibility complex, transactivator | B         | 1                   |
| MmuSTS.3942.1.S1_at                        | CR2     | complement component receptor 2                            | B         | 1                   |
| MmugDNA.25496.1.S1_at                      | CTLA4   | cytotoxic T-lymphocyte-associated protein 4                | B         | 1                   |
| MmugDNA.5901.1.S1_at                       | FAS     | Fas cell surface death receptor                            | B         | 1                   |
| MmugDNA.8857.1.S1_at                       | FASLG   | Fas ligand (TNF superfamily, member 6)                     | B         | 1                   |
| MmugDNA.27012.1.S1_at                      | FKBP2   | FK506 binding protein 2, 13kDa                             | P         | 1                   |
| MmugDNA.38565.1.S1_at                      | FOS     | FBJ murine osteosarcoma viral oncogene homolog             | B         | 1                   |
| MmuSTS.165.1.S1_at                         | ID3     | inhibitor of DNA binding 3                                 | B         | 1                   |
| MmugDNA.20492.1.S1_at                      | IGBP1   | immunoglobulin (CD79A) binding protein 1                   | B         | 1                   |
| MmugDNA.2488.1.S1_at                       | IGHD    | immunoglobulin heavy constant delta                        | B         | 1                   |
| MmuSTS.4350.1.S1_at                        | IGHM    | immunoglobulin heavy constant mu                           | B         | 1                   |
| MmunewRS.438.1.S1_at                       | IL2     | interleukin 2                                              | B         | 1                   |
| MmugDNA.42882.1.S1_x_at                    | SPN     | sialophorin                                                | B,P       | 1                   |
| MmuSTS.4526.1.S1_at                        | SYK     | spleen tyrosine kinase                                     | B         | 1                   |
| MmuSTS.4672.1.S1_at                        | TNF     | tumor necrosis factor                                      | B         | 1                   |
| MmuSTS.1841.1.S1_at                        | XBP1    | X-box binding protein 1                                    | B,P       | 1                   |
| MmugDNA.35906.1.S1_at                      | CD40    | CD40 molecule, TNF receptor superfamily member 5           | B         | 1,3                 |
| MmugDNA.19086.1.S1_at                      | IL10    | interleukin 10                                             | B         | 1,3,4               |
| MmugDNA.20386.1.S1_at                      | IL4     | interleukin 4                                              | B         | 1,4                 |
| MmuSTS.4100.1.S1_at                        | TEC     | tec protein tyrosine kinase                                | B         | 1,4                 |
| <b><i>B-cell activation</i></b>            |         |                                                            |           |                     |
| MmugDNA.20995.1.S1_at                      | CCR1    | chemokine (C-C motif) receptor 1                           | B         | 2                   |
| MmuSTS.3487.1.S1_at                        | CD22    | CD22 molecule                                              | B         | 2                   |
| MmugDNA.12740.1.S1_at                      | CXCR5   | chemokine (C-X-C motif) receptor 5                         | B         | 2                   |
| MmugDNA.23725.1.S1_at                      | HSPA13  | heat shock protein 70kDa family, member 13                 | B,P       | 2                   |
| MmugDNA.21955.1.S1_at                      | ICAM1   | intercellular adhesion molecule 1                          | B         | 2                   |

|                               |              |                                                                                       |     |       |
|-------------------------------|--------------|---------------------------------------------------------------------------------------|-----|-------|
| MmugDNA.34534.1.S1_at         | ICAM3        | intercellular adhesion molecule 3                                                     | B   | 2     |
| MmugDNA.7551.1.S1_at          | ICOSLG       | inducible T-cell co-stimulator ligand                                                 | B   | 2     |
| MmuSTS.173.1.S1_at            | IFNG         | interferon, gamma                                                                     | B   | 2     |
| MmugDNA.21956.1.S1_at         | IFNGR1       | interferon gamma receptor 1                                                           | B   | 2     |
| MmugDNA.13394.1.S1_at         | LILRA1       | leukocyte immunoglobulin-like receptor, subfamily A, member 1                         | B   | 2     |
| MmuSTS.2816.1.S1_at           | LILRA2       | leukocyte immunoglobulin-like receptor, subfamily A, member 2                         | B   | 2     |
| MmugDNA.13391.1.S1_at         | LILRA3       | leukocyte immunoglobulin-like receptor, subfamily A, member 3                         | B   | 2     |
| MmuSTS.215.1.S1_at            | LILRA4       | leukocyte immunoglobulin-like receptor, subfamily A, member 4                         | B   | 2     |
| MmugDNA.31251.1.S1_s_at       | LILRA5       | leukocyte immunoglobulin-like receptor, subfamily A, member 5                         | B   | 2     |
| MmugDNA.15576.1.S1_at         | LILRB1       | leukocyte immunoglobulin-like receptor, subfamily B, member 1                         | B   | 2     |
| MmugDNA.33060.1.S1_x_at       | LILRB2       | leukocyte immunoglobulin-like receptor, subfamily B, member 2                         | B   | 2     |
| MmugDNA.13397.1.S1_x_at       | LILRB3       | leukocyte immunoglobulin-like receptor, subfamily B, member 3                         | B   | 2     |
| MmugDNA.31218.1.S1_at         | LILRB4       | leukocyte immunoglobulin-like receptor, subfamily B, member 4                         | B   | 2     |
| MmuSTS.4604.1.S1_at           | LILRB5       | leukocyte immunoglobulin-like receptor, subfamily B, member 5                         | B   | 2     |
| MmuSTS.1025.1.S1_at           | NFKBIE       | nuclear factor of kappa light polypeptide gene enhancer in B-cells inhibitor, epsilon | B   | 2     |
| MmugDNA.28182.1.S1_at         | PECAM1       | platelet/endothelial cell adhesion molecule 1                                         | B,P | 2     |
| MmuSTS.3029.1.S1_at           | PRCP         | prolylcarboxypeptidase (angiotensinase C)                                             | P   | 2     |
| MmuSTS.2318.1.S1_at           | PRKCD        | protein kinase C, delta                                                               | B   | 2     |
| MmugDNA.27833.1.S1_at         | TGFB1        | transforming growth factor, beta 1                                                    | B   | 2     |
| MmugDNA.32051.1.S1_at         | TGFBR2       | transforming growth factor, beta receptor II (70/80kDa)                               | B   | 2     |
| MmuSTS.4607.1.S1_at           | TNFRSF13C    | tumor necrosis factor receptor superfamily, member 13C                                | B   | 2     |
| MmugDNA.635.1.S1_at           | TNFSF13B     | tumor necrosis factor (ligand) superfamily, member 13b                                | B   | 2     |
| MmuSTS.686.1.S1_at            | IL7          | interleukin 7                                                                         | B   | 2,3   |
| MmuSTS.3131.1.S1_at           | RGS1         | regulator of G-protein signaling 1                                                    | B   | 2,3   |
| MmugDNA.20554.1.S1_at         | LYN          | v-yes-1 oncogene homolog                                                              | B   | 2,3,4 |
| MmugDNA.17218.1.S1_at         | ADA          | adenosine deaminase                                                                   | B,P | 2,4   |
| MmugDNA.5951.1.S1_at          | MS4A1 (CD20) | membrane-spanning 4-domains, subfamily A, member 1                                    | B   | 2,4   |
| MmugDNA.16923.1.S1_at         | TNFRSF13B    | tumor necrosis factor receptor superfamily, member 13B                                | B   | 2,4   |
| <b>Cellular proliferation</b> |              |                                                                                       |     |       |
| MmugDNA.15422.1.S1_at         | AIM1         | absent in melanoma 1                                                                  | B   | 3     |
| MmuSTS.3462.1.S1_at           | BAD          | BCL2-associated agonist of cell death                                                 | B   | 3     |
| MmugDNA.16559.1.S1_at         | BANK1        | B-cell scaffold protein with ankyrin repeats 1                                        | B   | 3     |
| MmugDNA.3082.1.S1_at          | BCL10        | B-cell CLL/lymphoma 10                                                                | B   | 3     |

|                                              |               |                                                                                 |      |     |
|----------------------------------------------|---------------|---------------------------------------------------------------------------------|------|-----|
| MmugDNA.3186.1.S1_at                         | BCL11A        | B-cell CLL/lymphoma 11A (zinc finger protein)                                   | B    | 3   |
| MmuSTS.3201.1.S1_at                          | BCL2          | B-cell CLL/lymphoma 2                                                           | B    | 3   |
| MmugDNA.18029.1.S1_at                        | BCL2L1        | apoptosis regulator Bcl-2-like LOC707407                                        | B    | 3   |
| MmuSTS.3285.1.S1_at                          | CASP10        | caspase 10, apoptosis-related cysteine peptidase                                | P    | 3   |
| MmuSTS.2919.1.S1_s_at                        | CD11c (ITGAX) | integrin, alpha X (C3 receptor 4 subunit)                                       | B    | 3   |
| MmuSTS.1849.1.S1_at                          | CD38          | CD38 molecule                                                                   | B,P  | 3   |
| MmugDNA.15084.1.S1_s_at                      | CD52          | CD52 molecule                                                                   | B    | 3   |
| MmugDNA.14377.1.S1_s_at                      | CD58          | CD58 molecule                                                                   | B    | 3   |
| MmugDNA.6428.1.S1_at                         | CD81          | CD81 molecule                                                                   | B    | 3   |
| Mmu.7236.1.S1_s_at                           | CD9           | CD9 molecule                                                                    | B,P  | 3   |
| MmugDNA.5215.1.S1_at                         | DUSP4         | dual specificity phosphatase 4                                                  | B    | 3   |
| MmuSTS.4458.1.S1_at                          | FGR           | Gardner-Rasheed feline sarcoma viral (v-fgr) oncogene homolog                   | B    | 3   |
| MmugDNA.13690.1.S1_at                        | FKBP11        | FK506 binding protein 11, 19 kDa                                                | B    | 3   |
| MmugDNA.43558.1.S1_at                        | FLT3          | fms-related tyrosine kinase 3                                                   | B    | 3   |
| MmugDNA.17463.1.S1_at                        | GPR160        | G protein-coupled receptor 160                                                  | B    | 3   |
| MmugDNA.11374.1.S1_s_at                      | ICAM2         | intercellular adhesion molecule 2                                               | B,P  | 3   |
| MmuSTS.2912.1.S1_at                          | IL4R          | interleukin 4 receptor                                                          | B,P  | 3   |
| MmuSTS.249.1.S1_at                           | ITGB2         | integrin beta-2-like                                                            | B    | 3   |
| MmuSTS.1430.1.S1_at                          | KLF4          | Kruppel-like factor 4 (gut)                                                     | B    | 3   |
| MmugDNA.26175.1.S1_s_at                      | LGALS1        | lectin, galactoside-binding, soluble, 1                                         | B    | 3   |
| MmugDNA.8321.1.S1_at                         | MARCKS        | myristoylated alanine-rich protein kinase C substrate                           | B    | 3   |
| MmugDNA.42566.1.S1_at                        | NFKB2         | nuclear factor of kappa light polypeptide gene enhancer in B-cells 2 (p49/p100) | B,MP | 3   |
| MmuSTS.3737.1.S1_at                          | PTPRC         | protein tyrosine phosphatase, receptor type, C                                  | B    | 3   |
| MmuSTS.3377.1.S1_at                          | RELA          | v-rel reticuloendotheliosis viral oncogene homolog A                            | B    | 3   |
| MmuSTS.2853.1.S1_at                          | RHOH          | ras homolog gene family, member H                                               | B,P  | 3   |
| MmugDNA.9398.1.S1_at                         | RUNX2         | runt-related transcription factor 2                                             | B    | 3   |
| MmugDNA.25329.1.S1_at                        | SLC2A14       | solute carrier family 2, member 14                                              | B    | 3   |
| MmugDNA.21307.1.S1_at                        | TIMP2         | TIMP metalloproteinase inhibitor 2                                              | P    | 3   |
| MmugDNA.33493.1.S1_at                        | TP63          | tumor protein p63                                                               | P    | 3   |
| MmugDNA.24681.1.S1_at                        | VAV1          | vav 1 guanine nucleotide exchange factor                                        | B    | 3   |
| MmuSTS.2884.1.S1_at                          | CD27          | CD27 molecule                                                                   | B,P  | 3,4 |
| MmuSTS.4537.1.S1_at                          | LRMP          | lymphoid-restricted membrane protein                                            | B,P  | 3,4 |
| MmuSTS.3011.1.S1_at                          | NFKB1         | nuclear factor of kappa light polypeptide gene enhancer in B-cells 1            | B    | 3,4 |
| MmuSTS.3758.1.S1_at                          | RAC1          | ras-related C3 botulinum toxin substrate 1                                      | B    | 3,4 |
| <b><i>Differentiation and maturation</i></b> |               |                                                                                 |      |     |
| MmugDNA.9644.1.S1_at                         | AICDA         | activation-induced cytidine deaminase                                           | B    | 4   |
| MmugDNA.13724.1.S1_at                        | BACE2         | beta-site APP-cleaving enzyme 2                                                 | B    | 4   |
| MmuSTS.3524.1.S1_at                          | BIK           | BCL2-interacting killer (apoptosis-inducing)                                    | B,P  | 4   |

|                         |                         |                                                                              |     |   |
|-------------------------|-------------------------|------------------------------------------------------------------------------|-----|---|
| MmugDNA.34.1.S1_at      | BLNK                    | B-cell linker                                                                | B   | 4 |
| MmugDNA.29374.1.S1_at   | BMI1                    | Similar to 60S ribosomal protein L32                                         | B,P | 4 |
| MmuSTS.4534.1.S1_at     | BTK                     | LOC694196<br>Bruton agammaglobulinemia tyrosine kinase                       | B   | 4 |
| MmugDNA.36749.1.S1_at   | CCR2                    | chemokine (C-C motif) receptor 2                                             | P   | 4 |
| MmugDNA.22748.1.S1_at   | CD11a<br>(ITGAL)        | integrin, alpha L                                                            | B   | 4 |
| MmugDNA.39285.1.S1_at   | CD23<br>(FCER2)         | Fc fragment of IgE, low affinity II, receptor for (CD23)                     | B   | 4 |
| MmuSTS.3358.1.S1_at     | CD34                    | CD34 molecule                                                                | B   | 4 |
| MmugDNA.22843.1.S1_at   | CD79A                   | CD79a molecule, immunoglobulin-associated alpha                              | B   | 4 |
| MmugDNA.41966.1.S1_at   | DNTT                    | DNA nucleotidylexotransferase, terminal                                      | B   | 4 |
| MmugDNA.35031.1.S1_at   | EBF1                    | early B-cell factor 1                                                        | B   | 4 |
| MmuSTS.217.1.S1_at      | EBF2                    | early B-cell factor 2                                                        | B   | 4 |
| MmugDNA.12797.1.S1_at   | EBF3                    | early B-cell factor 3                                                        | B   | 4 |
| MmugDNA.7540.1.S1_at    | EBF4                    | early B-cell factor 4                                                        | B   | 4 |
| MmugDNA.37796.1.S1_at   | FBXO33                  | F-box protein 33                                                             | B   | 4 |
| MmugDNA.41570.1.S1_at   | FCRL4                   | Fc receptor-like 4                                                           | B   | 4 |
| MmugDNA.31335.1.S1_at   | FOXP1                   | forkhead box P1                                                              | B   | 4 |
| MmuSTS.2022.1.S1_at     | HPGDS                   | hematopoietic prostaglandin D synthase                                       | B   | 4 |
| Mmu.15620.1.S1_at       | IGH                     | Ig heavy chain uncharacterized                                               | B   | 4 |
| MmugDNA.24969.1.S1_at   | IGHG1                   | LOC101925124<br>Ig heavy chain similar to hCG2042717                         | B   | 4 |
| MmugDNA.7664.1.S1_at    | IGHMBP2                 | immunoglobulin mu binding protein 2                                          | B   | 4 |
| MmugDNA.28431.1.S1_x_at | IGHV@                   | similar to immunoglobulin heavy locus                                        | B   | 4 |
| MmugDNA.21021.1.S1_at   | IGHV3-VH26              | LOC100291190<br>immunoglobulin heavy chain variable region V-III region VH26 | B   | 4 |
| MmugDNA.17912.1.S1_at   | IGHV1 HG3<br>IGHV2 ARH- | similar to hCG1773549, LOC100133862                                          | B   | 4 |
| MmugDNA.14906.1.S1_s_at | 77                      | similar to hCG1812074, LOC100293559                                          | B   | 4 |
| MmugDNA.11413.1.S1_s_at | IGHV4-1                 | similar to hCG2043206, LOC100291786                                          | B   | 4 |
| MmunewRS.816.1.S1_s_at  | IGJ                     | immunoglobulin J polypeptide                                                 | B   | 4 |
| MmugDNA.39296.1.S1_at   | IGKC                    | similar to hCG26659 LOC100130100                                             | B   | 4 |
| MmugDNA.743.1.S1_at     | IGLL1                   | immunoglobulin lambda-like polypeptide 1                                     | B   | 4 |
| MmugDNA.37168.1.S1_at   | IKZF1                   | DNA-binding protein Ikaros-like                                              | B   | 4 |
| MmugDNA.23105.1.S1_s_at | IGLV2 BUR               | similar to Ig lambda chain, LOC100293440                                     | B   | 4 |
| MmugDNA.38781.1.S1_at   | IGLV3 LOI<br>IGKV1      | similar to hCG2040021, LOC100293277                                          | B   | 4 |
| Mmu.15443.1.S1_x_at     | HK102                   | similar to Ig kappa chain V-I region HK102 precursor LOC652493               | B   | 4 |
| MmugDNA.213.1.S1_at     | IL11                    | interleukin 11                                                               | B   | 4 |
| MmugDNA.34657.1.S1_at   | IRF4                    | interferon regulatory factor 4                                               | B,P | 4 |
| MmugDNA.26477.1.S1_at   | JUN                     | jun proto-oncogene                                                           | B   | 4 |
| MmugDNA.14389.1.S1_at   | KDM5A                   | lysine (K)-specific demethylase 5A                                           | B   | 4 |
| MmugDNA.3736.1.S1_at    | LCN10                   | lipocalin 10                                                                 | B   | 4 |
| MmugDNA.1162.1.S1_at    | MARCKSL1                | MARCKS-like 1                                                                | B,P | 4 |
| MmuSTS.2991.1.S1_at     | MME                     | membrane metallo-endopeptidase                                               | B   | 4 |

|                         |          |                                                                     |     |     |
|-------------------------|----------|---------------------------------------------------------------------|-----|-----|
| MmugDNA.38077.1.S1_at   | PAX5     | paired box 5                                                        | B   | 4   |
| MmuSTS.1127.1.S1_at     | PDCD1LG2 | programmed cell death 1 ligand 2                                    | B   | 4   |
| MmugDNA.31087.1.S1_at   | PIK3R1   | phosphoinositide-3-kinase, regulatory subunit 1 (alpha)             | B   | 4   |
| MmugDNA.39211.1.S1_at   | PRDM1    | PR domain containing 1, with ZNF domain                             | B,P | 4   |
| MmugDNA.13476.1.S1_at   | RAG1     | recombination activating gene 1                                     | B   | 4   |
| MmuSTS.3102.1.S1_at     | RAG2     | recombination activating gene 2                                     | B   | 4   |
| MmugDNA.6347.1.S1_at    | RUNX3    | runt-related transcription factor 3                                 | B   | 4   |
| MmugDNA.17370.1.S1_s_at | S100A6   | S100 calcium binding protein A6                                     | P   | 4   |
| MmugDNA.7683.1.S1_at    | SF1      | splicing factor 1                                                   | B   | 4   |
| MmugDNA.19747.1.S1_at   | SLC2A3   | solute carrier family 2, member 3                                   | B,P | 4   |
| MmugDNA.2786.1.S1_at    | SPI1     | spleen focus forming virus (SFFV) proviral integration oncogene     | B   | 4   |
| MmugDNA.31701.1.S1_at   | SPIB     | Spi-B transcription factor (Spi-1/PU.1 related)                     | B,P | 4   |
| MmugDNA.42036.1.S1_at   | TCF3     | transcription factor 3 (E2A immunoglobulin enhancer binding factor) | B   | 4   |
| MmugDNA.5879.1.S1_at    | TNFRSF17 | tumor necrosis factor receptor superfamily, member 17               | P   | 4   |
| MmugDNA.14490.1.S1_at   | TNFSF11  | tumor necrosis factor (ligand) superfamily, member 11               | B   | 4   |
| MmuSTS.4727.1.S1_s_at   | TUBA3C   | tubulin, alpha 3c                                                   | B   | 4   |
| MmugDNA.16332.1.S1_at   | VPREB1   | pre-B lymphocyte 1                                                  | B   | 4   |
| MmuSTS.2905.1.S1_at     | VPREB3   | pre-B lymphocyte 3                                                  | B   | 4   |
| MmuSTS.3145.1.S1_at     | NOMO1    | NODAL modulator 1                                                   | P   | 4,5 |
| MmugDNA.14099.1.S1_at   | PDIA5    | protein disulfide isomerase family A, member 5                      | P   | 4,5 |
| MmuSTS.2037.1.S1_at     | PDK1     | pyruvate dehydrogenase kinase, isozyme 1                            | P   | 4,5 |

### ***Plasmacyte functions***

|                         |         |                                                                    |       |   |
|-------------------------|---------|--------------------------------------------------------------------|-------|---|
| MmugDNA.31898.1.S1_s_at | APOE    | apolipoprotein E                                                   | EP    | 5 |
| MmuSTS.1868.1.S1_at     | CITED2  | cbp/p300-interacting transactivator 2-like                         | P     | 5 |
| MmugDNA.32965.1.S1_at   | DCN     | decorin                                                            | P     | 5 |
| MmugDNA.38506.1.S1_at   | EMP3    | epithelial membrane protein 3                                      | P     | 5 |
| MmuSTS.911.1.S1_at      | EZH2    | enhancer of zeste homolog 2 (Drosophila)                           | EP    | 5 |
| MmugDNA.732.1.S1_at     | HEXB    | hexosaminidase B (beta polypeptide)                                | P     | 5 |
| MmugDNA.20381.1.S1_at   | IL2RB   | interleukin 2 receptor, beta                                       | B, EP | 5 |
| MmuSTS.682.1.S1_at      | IL6R    | interleukin 6 receptor                                             | P     | 5 |
| MmugDNA.32094.1.S1_at   | LGALS3  | lectin, galactoside-binding, soluble, 3                            | P     | 5 |
| MmugDNA.2300.1.S1_at    | PKM2    | pyruvate kinase, muscle                                            | P     | 5 |
| MmuSTS.2359.1.S1_at     | S100A11 | S100 calcium binding protein A11                                   | P     | 5 |
| Mmu.2304.1.S1_at        | SELL    | selectin L                                                         | EP    | 5 |
| MmugDNA.27663.1.S1_at   | SELPLG  | selectin P ligand subunit of the oligosaccharyltransferase complex | P     | 5 |
| MmugDNA.21146.1.S1_at   | STT3A   | complex                                                            | P     | 5 |
| MmugDNA.150.1.S1_at     | TCEA1   | transcription elongation factor A (SII), 1                         | P     | 5 |
| MmuSTS.2229.1.S1_at     | TCN2    | transcobalamin II                                                  | P     | 5 |
| MmuSTS.4697.1.S1_at     | VCAM1   | vascular cell adhesion molecule 1                                  | EP    | 5 |

|                         |        |                                          |    |   |
|-------------------------|--------|------------------------------------------|----|---|
| MmugDNA.35432.1.S1_at   | CST3   | cystatin C                               | MP | 6 |
| MmugDNA.35537.1.S1_at   | CTSL   | cathepsin L1-like                        | MP | 6 |
| MmugDNA.11572.1.S1_at   | CXCL12 | chemokine (C-X-C motif) ligand 12 (SDF1) | MP | 6 |
| MmuSTS.4085.1.S1_at     | DUSP1  | dual specificity phosphatase 1           | MP | 6 |
| MmugDNA.21448.1.S1_at   | ITGA8  | integrin, alpha 8                        | MP | 6 |
| MmugDNA.14544.1.S1_at   | LGMN   | legumain                                 | MP | 6 |
| MmugDNA.30644.1.S1_at   | MDK    | midkine-like                             | MP | 6 |
| MmugDNA.27367.1.S1_x_at | SDC1   | syndecan 1                               | MP | 6 |

Cell type denotes: B – B cell, P – plasmacyte, EP – early plasmacyte, MP – mature plasmacyte  
Functional category denotes: 1 – antigen-dependent activation, 2 – B cell activation; 3 – B cell proliferation,  
4 – B cell differentiation and maturation, 5/6 – plasmacyte related genes
